# Supplementary material
Source: PubMed Central journal article supplement (PMC5624365)

**Supplemental Figure 1.** Negative controls for not commercially available antibodies raised in rabbits. Immunohistochemical stainings for (A) collagen IX, (B) decorin, (C) COMP and (D) matrilin-3. The respective controls for collagen IX and COMP are rabbit IgGs, polyclonal (Abcam #37415) in a concentration of (E) 5 µg/ml and (F) 10 µg/ml, respectively. Control stainings for decorin and matrilin-3 were performed with rabbit preimmunsera in a 1:1000 (G) and 1:500 (F) dilution corresponding to the dilution of the respective antibodies. All stainings were performed on healthy control samples. Scale bars 200 µm.

Collagen IX

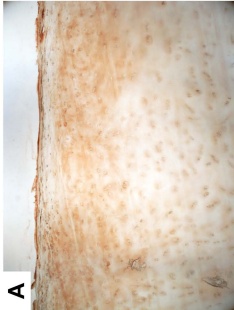

Decorin

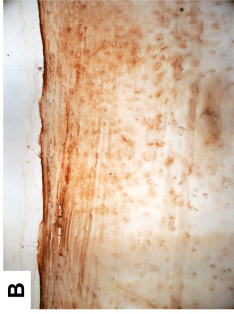

COMP

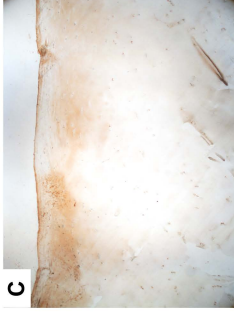

Matrilin-3

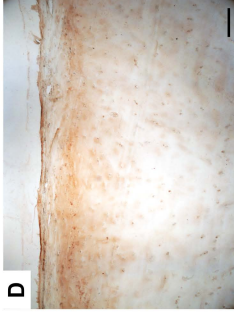

Rabbit IgG (5 µg/ml)

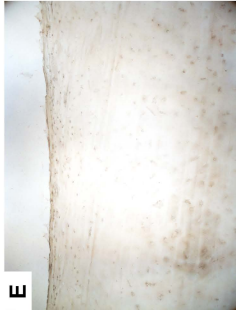

Rabbit IgG (10 µg/ml)

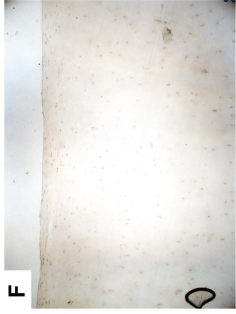

Rabbit serum (1:1000)

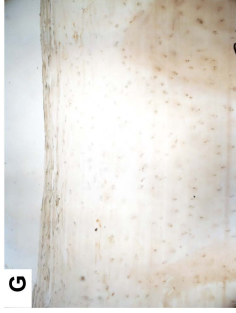

Rabbit serum (1:500)

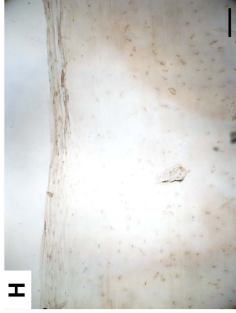

Supplement: JHC-17-0070.R1_Production_Supplemental_Figure_1_online_supp.pdf [file JHC-17-0070.R1_Production_Supplemental_Figure_1_online_supp.pdf]
