# Supplementary material
Source: PubMed Central journal article supplement (PMC5624365)
Supplement: JHC-17-0070.R1_Production_Supplemental_Table_1_online_supp.pdf [file JHC-17-0070.R1_Production_Supplemental_Table_1_online_supp.pdf]

**Supplemental Table 1. Antibodies**

| Antigen                                           | Host   | Source                            | Dilution |
|---------------------------------------------------|--------|-----------------------------------|----------|
| Collagen II                                       | Mouse  | Calbiochem, Darmstadt,<br>Germany | 1:500    |
| Collagen IX (NC4<br>domain)                       | Rabbit | (71)                              | 1:1000   |
| COMP                                              | Rabbit | (44)                              | 1:1000   |
| Decorin                                           | Rabbit | (Kamper M, unpublished data)      | 1:500    |
| Matrilin-3                                        | Rabbit | (43)                              | 1:500    |
| Rabbit IgG (horseradish<br>peroxidase conjugated) | Swine  | Dako, Glostrup, Denmark           | 1:100    |
| Mouse IgG (horseradish<br>peroxidase conjugated)  | Rabbit | Dako, Glostrup, Denmark           | 1:100    |
